1 **Fibroblasts-dependent maturation and phenotype exacerbation of dystrophic hiPSC-derived**  
2 **MYOtissues enables muscle strength evaluation for gene therapy screening**

3

4 Short title

5 **DMD MYOtissues as screening platform for gene therapy**

6

7 Laura Palmieri<sup>1,2</sup>, Melissa Moula,<sup>1,2</sup> Abbass Jaber<sup>1,2</sup>, Riyadh El-Khoury<sup>1,2,3</sup>, Guy Brochiet<sup>3,4</sup>, Anne  
8 Bigot<sup>5</sup>, David Israeli<sup>1,2</sup>, IsabelleRichard<sup>1,2</sup>, Sonia Albini<sup>1,2\*</sup>

9 <sup>1</sup>Genethon, 91100 Evry, France; <sup>2</sup>Université Paris-Saclay, Univ Evry, Inserm, Généthon, Integrare  
10 research unit UMR\_S951, 91000, Evry, France. <sup>3</sup>Institut de Myologie, Neuromuscular Morphology Unit,  
11 Groupe Hospitalier Pitié-Salpêtrière, Paris, France. <sup>4</sup>AP-HP, Centre de Référence de Pathologie  
12 Neuromusculaire Nord/Est/Ile de France, Groupe Hospitalier Pitié-Salpêtrière, Paris, France. <sup>5</sup>Sorbonne  
13 Université, Inserm, Institut de Myologie, Centre de Recherche en Myologie, F-75013 Paris, France.

14

15 \* Corresponding author. Email: [salbini@genethon.fr](mailto:salbini@genethon.fr), ORCID: 0000-0001-9502-1004

16

17 **ABSTRACT**

18

19 Duchenne muscular dystrophy (DMD) is a lethal muscle wasting disease caused by absence of  
20 dystrophin, a protein essential to preserve muscle integrity continuously challenged by contractions.  
21 Gene therapy utilizing adeno-associated virus (AAV) to deliver truncated forms of dystrophin ( $\mu$ Dys) is  
22 currently the most promising therapeutic approach. However, the therapeutic outcome in treated patients  
23 has not been as successful as anticipated by animal studies, underscoring the need of improved and high-  
24 throughput models for accurate and fast prediction of human response. Here, we describe the generation  
25 of MYOtissues, a 3D muscle platform based on direct myogenic conversion of human induced  
26 pluripotent stem cells (iPSC), whose structural and functional maturation is enhanced by fibroblasts  
27 incorporation. MYOtissues derived from DMD-iPSC including DMD fibroblasts, exacerbated  
28 pathogenic hallmarks such as fibrosis and muscle force loss. As a proof of concept, we showed that  
29 AAV-mediated  $\mu$ Dys gene transfer improved muscle resistance and membrane stability in DMD-  
30 MYOtissues, highlighting the suitability of our system for gene therapy screening.

31 **Introduction**

32 Duchenne muscular dystrophy (DMD; ONIM: #310200) is the most common and severe muscle  
33 disorder in children, with a prevalence of 1:5000 boys (1) with no resolutive cure up to date. DMD  
34 is caused by genetic mutations in the dystrophin gene that results in the lack of Dystrophin, a key  
35 protein of the sarcolemma required for the biochemical support of myofibers and force  
36 transmission (2–5). DMD is characterized by progressive muscle wasting affecting skeletal  
37 muscles primarily and cardiac and respiratory muscles later, thereby causing premature death (6).  
38 Dystrophin links the sarcolemma with the extracellular matrix (ECM) through the dystrophin  
39 glycoprotein complex (DGC) and therefore its absence renders muscle cells susceptible to  
40 contraction-induced damage (7,8). Moreover, consecutive rounds of muscle membrane  
41 degeneration and regeneration caused by the mechanical stress, induce, in turn, secondary  
42 pathogenic events such as chronic inflammation and fibrosis that exacerbate the disease phenotype  
43 (9–12). Fibrosis, an excessive deposition of ECM components, is a critical driver of DMD  
44 progression. Indeed, secretion of TGF $\beta$  (Transforming Growth Factor beta), the major  
45 profibrogenic factor released from damaged muscle cells, stimulates the production of ECM  
46 components, mainly from fibroblasts but also autonomously from myofibers (13–15) causing loss  
47 of muscle function.

48 Gene therapy exploiting adeno-associated virus (AAV) to deliver the therapeutic payload is  
49 currently the most promising therapeutical approach for DMD as proved by ongoing clinical trials  
50 employing short forms of Dystrophin ( $\mu$ Dys) encoding a truncated, but functional, protein (16–22).  
51 However, while the therapeutic effects were unequivocally achieved in DMD animal models, the  
52 results from clinical trials revealed limited therapeutic efficacy as well as unexpected safety issues  
53 (23).

54 These observations confirm the limited translatability of results obtained in animal models to  
55 human patients. Moreover, increasing evidences highlighted the sub-optimal activity of  $\mu$ Dys,  
56 likely due to absent protein domains, preventing full correction of the phenotype and making  
57 necessary the investigation of new treatments (24,25). It appears therefore crucial to develop high  
58 throughput models mimicking human DMD pathology, suitable to quickly test the efficacy of  
59 therapeutics, more reliably and with reduced animal waste and costs. *In vitro* modeling based on  
60 human cells is a valuable option. In particular, the induced pluripotent stem cells (iPSC) technology  
61 offers the opportunity to derive an unlimited number of specialized cells using patients' cells for  
62 disease modeling and drug screening (26,27). Among the *in vitro* cellular models, organoid-like  
63 structures are becoming invaluable for disease modeling as the use of 3D cultures and biomaterials  
64 allows the reconstitution of tissue architecture and microenvironment that are instrumental for

65 pathophysiological evaluations (28,29). However, organoid applications for AAV gene therapy  
66 have been limitedly explored and mostly in the context of retinopathies (27,30–34). No reports are  
67 available to date on the use of muscle organoids for AAV gene replacement therapy application  
68 and only AAV-based CRISPR-Cas9 correction of DMD iPSC prior to formation of organoids were  
69 reported as gene therapy approach (35).

70 For skeletal muscle engineering, several differentiation protocols from human iPSC (iPSC) are  
71 available (36–39). However, they present limitations associated with the long duration of the  
72 protocol, up to 60 days, due to the multiple cellular transitions mediated by media  
73 supplementations. Although this approach mimics muscle development, it is subjected to higher  
74 inter-experimental variability due to the heterogeneity of the cell population. Additionally, muscle  
75 force analysis remains a challenge in the field, only partially explored, especially for muscle  
76 resistance evaluation. Here, we described the rapid generation of iPSC-derived muscle organoid-  
77 like structure, crafted to include only specific cell types, and named hereafter MYOtissues. We  
78 employed and adapted an engineered muscle platform to generate MYOtissues using a previously  
79 reported method for direct iPSC conversion into skeletal muscles cells (13,40,41). We further  
80 included fibroblasts to increase structural maturation, according to their reported role in helping  
81 muscle assembly, and as a source of microenvironment cues exerted by their secretory activity (42–  
82 45). We demonstrated that fibroblasts-including MYOtissues showed improved structural  
83 organization and developed higher muscle force during contractions. Remarkably, DMD iPSC-  
84 derived MYOtissues that included DMD-fibroblasts displayed exacerbated pathogenic features  
85 related to muscle fragility, that allowed significant detection of muscle dysfunctions defined as key  
86 therapeutic readouts.

87 We then applied AAV-mediated  $\mu$ Dys gene replacement, a gold standard in DMD gene therapy,  
88 as a proof of concept of the suitability of MYOtissues as a platform for therapeutic evaluation. We  
89 showed a dose-dependent response in the efficacy of  $\mu$ Dys to restore muscle function and  
90 membrane stability and revealed partial correction at optimal doses. Our findings indicate that  
91 MYOtissues derived from dystrophic iPSC, whose phenotype is exacerbated by fibroblast  
92 inclusion, could be used as preclinical human models for muscle force-based screens with the  
93 potential to accelerate the identifications of effective therapeutics for DMD.

94 **Results**

95

96 **Generation of structurally organized 3D human MYOtissues by direct conversion of iPSC**  
97 **and inclusion of fibroblasts**

98 MYOtissues were generated from human iPSC committed to differentiate into the myogenic  
99 lineage by inducible expression of MyoD and BAF60C (13), from now on referred as iPSC<sup>BM</sup>.  
100 MYOtissues were prepared starting from iPSC<sup>BM</sup> after one day from the induction of myogenic  
101 genes. Casting procedure was performed through adaptation of an engineered muscle system  
102 (39,46) which results in the growth of the tissue in a ring format supported by two flexible silicon  
103 stretchers (**Figure 1A**). The differentiation protocol was optimized from the conditions previously  
104 reported (13,40,41) using myogenic commercial media that ensured the highest expression of  
105 myogenic markers and myogenic differentiation in monolayer condition. Since cellular  
106 heterogeneity, especially of mesenchymal origin, has been shown to be important for muscle  
107 formation (39,45,47,48), we included human immortalized fibroblasts during the casting  
108 procedure, to assess whether this would affect muscle organization. For this aim, casting was  
109 performed using iPSC<sup>BM</sup> cells in presence or absence of human fibroblasts. The 3D cultures were  
110 kept for 2 days in growth medium, afterwards medium was replaced for differentiation for  
111 additional 12 days (**Figure 1A**). A pilot study was conducted to identify the optimal fibroblast  
112 concentration required to achieve correct differentiation and high-level organization. We found  
113 that inclusion of fibroblasts accelerated the condensation of the muscle rings into a compact  
114 structure 0.8 mm long and 1mm thick at day 14 (**Figure 1B**). At that time point, we characterized  
115 the muscle differentiation in the MYOtissues by performing immunofluorescence (IF) in whole-  
116 mount tissues for sarcomeric  $\alpha$ -actinin (SAA), and we could clearly observe an enrichment of SAA  
117 positives myotubes throughout the ring-shaped micro-tissue (**Figure 1C**). We then aimed to assess  
118 the impact of fibroblasts inclusion on muscle structure. For that, alignment of myotube and  
119 circularity were evaluated. Staining for Myosin Heavy Chain (MyHC, myotube marker) and  
120 Vimentin (fibroblasts marker) on longitudinal sections showed fibroblasts recruitment near muscle  
121 fibers (**Figure 1D**). Measurement of the angles between the myotubes showed a significant  
122 decrease with fibroblasts inclusion, which correlates with a better myotube alignment (**Figure 1E**).  
123 Additionally, circularity of myofibers was measured from transversal sections stained for the  
124 membrane marker WGA (wheat germ agglutinin), using ratio between X and Y Feret diameters  
125 (**Figure 1D**). MYOtissues with fibroblasts had an improved circularity (ratio closer to 1) when  
126 compared to control (**Figure 1E**). Improved myofiber circularity and myotubes alignment as

127 shown, indicate that fibroblasts incorporation during the casting procedure, guides myofiber  
128 orientation providing structural support for MYO tissues, a prerequisite for maturation.

129

### 130 **Improved structural and functional maturation of fibroblast-including MYO tissues**

131 Since muscle function is strictly dependent on the internal myofiber organization, we evaluated the  
132 maturation of our 3D MYO tissues by looking at the sarcomere structure. Transversal and  
133 longitudinal sections were used to monitor Dystrophin expression at the sarcolemma (**Figure 2A**)  
134 and SAA localization for assessment of the striation pattern typical of mature myotubes (**Figure**  
135 **2B**). Dystrophin was properly localized to the muscle membrane of myotubes from MYO tissues  
136 including fibroblasts and was significantly more expressed compared to MYO tissues without  
137 fibroblasts (**Figure 2A, D**). Remarkably, the maturation index, reported as percentage of number  
138 of nuclei included in striated myotubes, was significantly superior in MYO tissues including  
139 fibroblasts as compared to MYO tissues without fibroblasts which appear very disorganized with  
140 rare appearance of striations (**Figure 2B, E**). The proper sarcomeric organization was also  
141 confirmed by electron microscopy where we could clearly detect longer, properly formed Z  
142 patterning, presence of I and A bands along with an overall increase of sarcomeric density and  
143 alignment (**Figure 2C**). We further performed gene expression analysis for terminal differentiation  
144 markers such as muscle creatine kinase (*MCK*), myosin heavy chain isoforms, such as *MYH2*,  
145 representative of fast adult fiber type, and *MYH7*, as a slow fibers marker (**Figure 2F**). Higher  
146 expression of all genes in MYO tissues containing fibroblasts, confirms the acquisition of a more  
147 mature state, compared to MYO tissues without fibroblasts.

148 We then assessed whether our MYO tissues were functional by looking at their physiological  
149 response to contraction stimulations, using a muscle organ bath system (49) based on electrical  
150 pacing. To evaluate muscle force, MYO tissues were weighted and then transferred to the muscle  
151 strip chamber (**Figure 2G**). Before performing force analysis, both optimal length ( $L_0$ ) and optimal  
152 frequency relationship were established to identify the optimal MYO tissues stretching and electric  
153 pulse frequency at which they developed peak of force (**Figure 2H**). The establishment of these  
154 parameters is essential to perform reliably muscle force comparisons between different types of  
155 MYO tissues. Indeed,  $L_0$  of fibroblast containing-MYO tissues was smaller than MYO tissues  
156 without fibroblasts as a result of more compact and stiff structure. We also verified that two weeks  
157 of maturation of the 3D culture was the optimal condition for functional evaluation. Indeed, at 3  
158 weeks of culture, we detected a loss of contraction force. Isometric force analysis revealed  
159 significantly higher tetanic force in MYO tissue containing fibroblasts compared to the control, as  
160 (**Figure 2I**). Values were then normalized indirectly for the cross sectional area (CSA) using the

161 weight and  $L_0$  established for each MYO tissues for each MYO tissues (43,50) and expressed as  
162 specific tetanic force ( $\text{mN}/\text{mm}^2$ ) (**Figure 2J**). In particular, the highest force with peak values  
163 ranging from 0.3 to 0.5 mN versus 0.1 to 0.2 mN in MYO tissues without fibroblasts after  
164 normalization (**Figure 2J**). These data demonstrated that MYO tissues plus fibroblasts have an  
165 improved structural organization and functional maturation that enables force contraction studies  
166 by electrical pacing.

167

### 168 **DMD iPSC-derived MYO tissues display exacerbated pathogenic hallmarks**

169 The improved muscle organization and functional maturation showed by iPSC-derived  
170 MYO tissues including fibroblasts, prompted us to exploit fibroblast features in disease modeling  
171 for DMD, where their role in disease progression is well known (14,15). We incorporated DMD  
172 fibroblasts as means to recapitulate the pathogenic microenvironment arising from their profibrotic  
173 activity exerted by tissue remodeling and matrix deposition (15,51). By this means we ultimately  
174 sought to reproduce the fibrotic-induced stiffness that could negatively affect contractile force of  
175 DMD MYO tissues, as it was shown previously in DMD cardiomyocytes (52). For that purpose,  
176 we used two DMD iPSC with different *DMD* mutations, a deletion of exon 45 (dEx45) or of exons  
177 8-9 (dEx8-9) (53) together with human DMD immortalized fibroblasts, to generate DMD  
178 MYO tissues. As control, two iPSC lines derived from healthy patients (Ctr1, Ctr2) were used and  
179 one representative (Ctr1) was carried for the further analysis after verifying comparable muscle  
180 differentiation and muscle performance. We additionally used as isogenic control, the DMD dEx8-  
181 9 iPSC corrected to restore dystrophin expression (53) (hereafter called corrDMD dEx8-9). Ctr or  
182 DMD MYO tissues were generated together with human healthy or DMD immortalized fibroblasts  
183 for histological, molecular and functional analyses. (**Figure 3A**). The myogenic differentiation of  
184 both Ctr and DMD iPSC lines was first tested in 2D and showed comparable differentiation  
185 efficiency. Histological characterization in MYO tissues, showed absence of Dystrophin protein in  
186 DMD MYO tissues and efficient myogenic differentiation and maturation in Ctr and DMD  
187 MYO tissues, as shown by the striated pattern visualized by SAA-stained sections (**Figure 3B**). We  
188 then monitored fibrotic hallmarks at histological level by looking at Fibronectin (Fn1), one of the  
189 major TGF $\beta$  target ECM gene and phosphorylated SMAD3 (pSMAD3), the transcriptional effector  
190 of canonical TGF $\beta$  pathway. Notably, DMD MYO tissues including DMD fibroblasts showed  
191 increase expression of Fn1 and increased number of pSMAD3 positive nuclei, indicating activation  
192 of TGF $\beta$  in DMD MYO tissues and fibrosis (**Figure 3B-C**). Presence of fibrosis within the DMD  
193 MYO tissues was also confirmed by the increased mRNA expression of Fn1 and Collagen 1



194 (Col1A) (**Figure 3D**). Additionally, we monitored the collagen secreted in the medium to further  
195 confirm the presence of fibrotic environment of DMD MYOtissues. For this aim, we used Collagen  
196 IV detecting assay, so to exclude the possibility to detect any contaminant Collagen coming from  
197 the matrix which is of type I. Notably, we observed an increase in Collagen IV released in the  
198 media of DMD MYOtissues, as compared to Ctr MYOtissues, that was significantly higher in the  
199 condition including fibroblasts (**Figure 3E**).

200 To assess whether DMD MYOtissues display hallmarks of DMD pathophysiology, we evaluated  
201 muscle function, that represents one of the most difficult challenges in the establishment of  
202 therapeutic readouts with *in vitro* systems. To identify reliable force parameters reflecting the  
203 defective DMD muscle performance, we subjected MYOtissues to isometric contractions (ISO) to  
204 measure tetanic force (**Figure 3F**), and to eccentric contractions (ECC) to assess muscle resistance  
205 and fatiguability (**Figure 3G**). As eccentric contraction plays a critical role in the disease  
206 progression of DMD (54) and repeated contractions trigger the degeneration/regeneration cycles  
207 (7), we used a specific ECC repetition protocol to assess muscle force loss and resistance under  
208 exhaustion. The protocol consisted of ten repetitions of ECC, where the force developed after each  
209 lengthening was calculated to trace muscle force drop over time. The drop force in both DMD  
210 dEx45 and dEx8-9-derived-MYOtissues (over 10 repetitions), was significantly higher than in  
211 control MYOtissues (Ctr1) and the corrected isogenic cell line (corrDMDdEx8-9) including or not  
212 fibroblasts (**Figure 3G**). To accurately quantify muscle fatigue, we calculated the fatigue index as  
213 drop of force between the isometric contractions performed before and after the 10x repetitions of  
214 ECC. The analysis showed a significant higher fatigue index in DMD MYOtissues as compared  
215 to Ctr MYOtissues and remarkably, this phenomenon was accentuated by the presence of  
216 fibroblasts. (**Figure 3H**). Collectively these data indicate that DMD MYOtissues including  
217 dystrophic fibroblasts, displayed significant and exacerbated reduction of muscle resistance and  
218 increase of fatigue index (**Figure 3G-H**), thereby defining them as the most appropriate system for  
219 further screenings. These data show that ECC-based drop force evaluation is a meaningful and  
220 reliable test to be used as therapeutic readouts as significant difference were detected between Ctr  
221 and DMD MYOtissues. These findings also indicate the necessity to activate and reveal the disease  
222 by mechanical challenges, which accelerates muscle fatigue in DMD MYOtissue as compared to  
223 Ctr MYOtissues.

224

225 **AAV- $\mu$ Dystrophin gene transfer improves muscle resistance and restoration of DGC**  
226 **components**

227 As proof of concept that MYO tissues were suitable as a screening platform for gene therapy products,  
228 we used AAV-mediated delivery of  $\mu$ Dystrophin and assessed its therapeutic efficacy in the DMD  
229 context. For this aim, we used AAV9, as this serotype was used in recent clinical trials and showed  
230 high transduction rate in patients' myofibers (55,56). AAV9 infectivity in 3D engineered muscles was  
231 evaluated by a GFP reporter system (57), however in vitro  $\mu$ dystrophin AAV gene transfer, to the best  
232 of our knowledge, has not yet been reported. We first optimized the infection conditions using the  
233 reporter AAV9-CMV-GFP in Ctr MYO tissues including fibroblasts. Infections were performed at day  
234 7 of the differentiation protocol, diluting AAV particles directly in the medium, and maintained for  
235 additional 7 days. We then used a codon optimized  $\mu$ Dystrophin gene (dR4-23) under the control of  
236 the muscle specific sp512 promoter (19) for gene transfer using AAV9 (AAV9- $\mu$ Dys) in DMDdEx45  
237 MYO tissues (**Figure 4A**). Low and high doses were established based on previous dosing studies to  
238 have intermediate transduction level at low dose ( $1E+9$ vg/MYO tissue), and high transduction level at  
239 high dose ( $5E+10$ vg/MYO tissue). Gene transfer efficiency was evaluated by quantification of Viral  
240 copy number (VCN) on genomic DNA extracted from MYO tissue and by expression level of the  
241 transgene and the encoded protein (**Figure 4B-D**). A clear dose-dependent entry of  $\mu$ Dys increase of  
242 DNA, mRNA and protein levels were detected following AAV9- $\mu$ Dys gene transfer in the  
243 MYO tissues. Histological quantification of  $\mu$ Dystrophin showed 30% of dystrophin positive  
244 myotubes at low dose compared to 95% in the high dose condition (**Figure 4E**, top panel).

245 Because dystrophin exerts its biomechanical support by holding the DGC in place, we monitored key  
246 components of the DGC, the transmembrane  $\beta$ -dystroglycan and the extra-cellular  $\alpha$ -dystroglycan,  
247 whose proper expression and localization is impaired in the absence of Dystrophin (58).  
248 Immunostaining on transversal MYO tissues showed a dose-dependent yet not complete restoration of  
249  $\alpha$ - and  $\beta$ -dystroglycan (**Figure 4E**, middle and low panel). Interestingly, even high doses ensuring  
250 nearly total Dystrophin transduction did not fully restore  $\alpha$  and  $\beta$ -dystroglycan, suggesting a potential  
251 therapeutic limitation of  $\mu$ Dys. Overall, these data demonstrate the efficiency of  $\mu$ Dystrophin gene  
252 transfer in DMD MYO tissues and partial, restoration of Dystrophin-associated components to the  
253 sarcolemma.

254

255



256  **$\mu$ Dystrophin gene transfer rescues muscle strength and reduces the inflammatory milieu**

257 To verify whether DGC restoration was associated to higher membrane stability and with protection from  
258 mechanical stress, Ctr and DMD MYOtissues treated or not with  $\mu$ Dys were subjected to muscle force  
259 analysis (**Figure 5A**). Interestingly, isometric tetanic force analysis did not reveal any significant increase  
260 in DMDdEx45 MYOtissues following  $\mu$ Dys delivery compared to not infected condition (**Figure 5B**).  
261 We then challenged the muscles by eccentric repetitions, and, under this condition, we observed a dose-  
262 dependent increase of muscle strength that reached significance only with high dose  $\mu$ Dys (**Figure 5C**).  
263 Consistently with the acquired muscle resistance, the fatigue index was greatly reduced in DMD  
264 MYOtissues treated with high dose of  $\mu$ Dys, close to the levels of Ctr MYOtissues (**Figure 5D**). These  
265 results were confirmed in MYOtissues derived from DMDdEx8-9 and its corrected isogenic control,  
266 where force analysis revealed improved muscle resistance and fatigue tolerance upon optimal  $\mu$ Dys  
267 delivery. These data indicate that high dose  $\mu$ Dys greatly improve muscle resistance and fatigue  
268 tolerance, whereas suboptimal transduction is not sufficient to significantly improve muscle strength, as  
269 shown by the partial gain of muscle strength in DMD dEx45-derived MYOtissues. One of the pathogenic  
270 hallmarks in damaged dystrophic muscle is the inflammatory response, mediated by proinflammatory  
271 cytokine release by myofibers, fibroblasts and infiltrating immune cells. For this aim, we looked at the  
272 secretion of Interleukin 1 (IL-1), Interleukin 6 (IL-6) and Tumor Necrosis Factor alpha (TNF $\alpha$ ), (11,59)  
273 in DMD dEx45-derived MYOtissues. Conditioned media was collected 24h before and after the eccentric  
274 contraction repetitions to measure secretion of the proteins of interest. Remarkably, secretion of the three  
275 factors decreased significantly upon  $\mu$ Dys restoration, in a dose-dependent manner and this effect was  
276 more important in the condition media after eccentric contractions (**Figure 5E**). These data confirmed  
277 the beneficial effect of  $\mu$ Dys in improving the pathogenic milieu, likely as a result of improved membrane  
278 stability and reduced mechanical stress.

279 **Discussion**

280

281 The investigation and identification of new therapeutic strategies to face DMD is hampered by the  
282 lack of disease models that mimic adequately human pathology and could serve as a reliable  
283 screening platform. Here, we report the generation of 3D engineered muscles called MYOtissues,  
284 composed by a homogeneous population of myogenic cells derived from direct conversion of iPSC  
285 (13,40) combined with a population of fibroblasts, casted in a collagen-based matrix. We employed  
286 fibroblasts to reach a mature muscle structure that resulted in higher functional performance under  
287 muscle force evaluation. We then included human DMD fibroblasts to increase the severity of DMD  
288 iPSC derived-MYOtissues phenotype, driven by their profibrotic activity, as shown by exacerbated  
289 muscle force loss upon mechanical stress. By employing AAV-mediated  $\mu$ Dys gene transfer, we  
290 demonstrated that DMD-MYOtissues highly transduced, recovered muscle resistance to eccentric  
291 contractions and partial membrane stability, with consequent amelioration of the inflammatory  
292 milieu. This evidence provides for the first time, the proof of principle of the suitability of DMD-  
293 MYOtissues as a reliable screening platform based on muscle strength assessment.

294

295 **Reliable muscle function evaluation in engineered skeletal muscle tissues**

296 Although several remarkable studies reported on muscle force in 3D models (39,53,60–62), muscle  
297 function evaluation is still a hurdle when coping with the difficulty in identifying disease-specific  
298 muscle force parameters, with the lack of an easy method to normalize muscle force and with the  
299 high variability of organoid models. Here we established parameters to evaluate muscle strength and  
300 fatigue index, defined as resistance to repeated eccentric contractions. These metrics, in addition to  
301 the already well-known correlation with the dystrophic phenotype (63), enables reliable force  
302 measurement independent of normalization, as it represents the ratio within the same engineered  
303 muscle tissue. Furthermore, our system showed reduce variability by minimizing intrinsic  
304 variabilities that could be caused by early defects during the pathogenesis. Several studies reported  
305 on a reduced myogenic differentiation ability in DMD-derived muscles, as compared to control. The  
306 difference in the myogenic gene expression pattern is likely due to the differentiation protocol used.  
307 As such, in protocol using chemical myogenic cocktails reproducing developmental cues it is more  
308 appropriate to detect early changes in DMD myopathies, while with direct transgene-based  
309 differentiation methods we can bypass and defective steps. As a result, our system aims at developing  
310 muscle artificial tissues from healthy or DMD iPSC that can be further challenged to activate and  
311 then reveal their pathogenic potential. This system has the advantage to be unbiased because we can  
312 perform muscle force analysis without considering the intrinsic contractile or myogenic defects that

313 would affecting muscle force necessarily (39,64,65). Therefore, we can perform screening in a  
314 reliable way, limiting intrinsic variables.

315

### 316 **Activating DMD phenotype**

317 Muscle development and differentiation requires cues elicited from the mesenchymal compartments  
318 (39,45). Since we used a transgene-based direct differentiation that bypasses the  
319 mesodermal/mesenchymal transition, we decided to use fibroblasts as they are the major component  
320 of the endomysium, the connective tissue surrounding the myofibers important for myofiber  
321 maturation (45,48). Fibroblasts were also shown to be important for self-assembly of the myofibers  
322 (42,47). We showed that including fibroblasts during the casting process, improved muscle  
323 alignment and the muscle force developed after electrical-induced contractions. Fibroblasts were  
324 mostly found in the external compartment of the 3D structure, surrounding and guiding muscle cells  
325 towards the same direction during differentiation, as shown by organized, elongated, and compact  
326 shape adopted when fibroblasts were included). As a result of the ameliorated muscle architecture  
327 and structural support, likely elicited by ECM production, fibroblasts containing-MYOtissues  
328 displayed more functional maturation and generated higher tetanus force during contraction.

329 We exploited fibroblasts also to exacerbate DMD phenotype until able to appreciate significant  
330 difference of the hallmarks of DMD pathology such as muscle function loss and fibrosis, caused by  
331 displacement of the DGC. For this purpose, we used DMD fibroblasts as a source of fibrotic cues to  
332 reproduce the pathogenic microenvironment and therefore exacerbate disease progression.  
333 Furthermore, is still unclear whether and how fibrosis impacts on contractility and muscle force in  
334 skeletal muscles. Recent studies shed light on the role of fibrosis-induced stiffness in contractile  
335 dysfunction of cardiomyocytes (52). It is tempting to hypothesize that pathogenic stiffening of  
336 muscle tissue is also involved in contraction defects and muscle force generation.

337 Collectively, our results showed that the use of severe modelling, characterize by a surrounding  
338 cytokine and fibrotic-rich milieu, and the use of a muscle exhaustion/fatigue test, allows improved  
339 modeling of DMD phenotype and enable reliable detection of pathological outcome once the muscle  
340 is stressed environmentally and mechanically.

341

### 342 **Challenges and perspectives**

343 By employing AAV-mediated delivery of  $\mu$ Dys, the gold-standard in the DMD gene therapy, we  
344 proved that pro-fibrotic DMD MYOtissues efficiently transduced with  $\mu$ Dys, recovered muscle  
345 strength and membrane stability. Interestingly, even high doses ensuring nearly total Dystrophin

346 transduction did not fully restore proper localization of key DGC members, opening the way to  
347 deeper interrogation of  $\mu$ Dys efficacy. One limitation of our approach relates to the use of non-  
348 isogenic fibroblast cell lines to generate MYOtissues that can introduce variabilities due to different  
349 genetic backgrounds. However, this study aimed firstly at identifying the involvement of fibroblasts  
350 derived from a specific pathophysiological context in the exacerbation of the DMD pathogenic  
351 hallmarks for screening purposes. Indeed, as shown in different DMD iPSC lines, DMD fibroblasts  
352 inclusion, by its excessive matrix deposition, allows more faithful recapitulation of the fibrotic and  
353 inflammatory milieu that impact on muscle function and membrane stability. Overall, the  
354 exacerbated severity of DMD MYOtissues allows a broader window to evaluate therapeutic potential  
355 of AAV gene therapy products. Next-generation MYOtissues will then have to be derived using  
356 isogenic myogenic and fibroblast populations. Additionally, it would be of interest to recapitulate in  
357 our system, the role of fibroblasts and fibro-adipogenic progenitors in the disease progression and  
358 how their plasticity, activation and frequency is affected within a DMD muscle context, as shown  
359 recently in *in vivo* single-cell studies (66). Therefore, the inclusion of healthy fibroblasts in the  
360 generation of DMD MYOtissues can provide insights into their fibrogenic activation that contributes  
361 to the severity of the dystrophic phenotype.

362 By exacerbating the disease with DMD fibroblasts-dependent release of fibrotic cues and  
363 inflammatory cues. Notably,  $\mu$ Dys delivery in DMD MYOtissues significantly attenuates the release  
364 of pro-inflammatory cytokines elicited by mechanical stress making our system suitable to integrate  
365 muscle function with the microenvironment. Thus, the MYOtissue platform provides the unique  
366 opportunity to associate the effect of gene transfer not only on the muscle function but also on the  
367 extracellular context that plays a key role in the initiation and progression of the disease. It will be  
368 interesting in the future to investigate the cross talk between muscle cells and fibroblasts that  
369 ultimately generate a pathogenic milieu in DMD muscles, that ultimately drives unbalanced immune  
370 response. In this regard, other cell populations such as macrophages, could be added in the  
371 MYOtissue to answer this question.

372 Because our protocol for muscle MYOtissue generation is fast, robust and allows large-scale testing,  
373 our system could be easily used as a testing platform not only for gene therapy but also to test  
374 pharmacological approaches. Thus, exacerbated MYOtissues provide a valuable human *in vitro*  
375 counterpart to animal *in vivo* preclinical studies, for a more stringent and reliable screening with the  
376 potential to accelerate the identifications of new treatments as wells as to unravel therapeutic  
377 limitations of current DMD treatments.

## 378 **Materials and Methods**

### 379 **Experimental design**

380 The objective of this study was to generate a human model of disease suitable for therapeutic  
381 screening or testing. We used control (Ctr) and DMD patients' iPSC to derive 3D muscle  
382 constructs, based on an optimized differentiation protocol and casting procedure, called  
383 MYOtissues. DMD MYOtissues were firstly characterized for their ability to recapitulate  
384 pathogenic features by histological evaluation in sections, gene expression analysis, secretome and  
385 force analysis. Of note, functional readouts were established in order to detect significant  
386 differences between Ctr and DMD MYOtissues such as eccentric contractions drop force analysis  
387 and fatigue index measurements. We then used DMD MYOtissue containing DMD fibroblasts to  
388 test the efficacy of gene therapy treatment using delivery of AAV9- $\mu$ Dys, by looking at the  
389 therapeutic readouts previously identified. Muscle force analysis after electrical-induced  
390 contractions, was performed looking at the tetanic force or at the drop force after eccentric  
391 contractions. At least 10 replicates (n, as indicated in the figure legend) were used for each  
392 condition. Molecular and serum biomarker analysis was performed in the same MYOtissue right  
393 after the force measurements, while histological analysis was performed on other replicates not  
394 receiving electrical stimuli. For muscle force analysis, normalization for CSA was performed to  
395 reduce inter and intra-variability.

396

### 397 **Cell culture and differentiation protocol**

398 Human iPSCs used in the study were as follow: Ctr1 (AG08C5) derived from healthy fibroblasts  
399 (AG08498, Coriell Institute), Ctr2 (I-Stem), iPSC DMDdEx45 (Coriell, GM25313); DMDdEx8-9  
400 and DMDdEx6-9 (corrected, isogenic control) (provided by Doctor E. Olson). iPSCs were  
401 maintained using mTESRplus medium and passaged using ReleSR (Stem Cell Tech) on matrigel  
402 coated wells (Corning). iPSC engineering and muscle differentiation was performed adapting a  
403 transgene-based method previously described (13,40). Briefly, iPSC expressing inducible Baf60C  
404 and MyoD (iPSC<sup>BM</sup>) were induced to express the transgenes by Doxycycline treatment in  
405 mTESRplus media. Then, iPSC<sup>BM</sup> were dissociated and, either plated at 60k cells/cm<sup>2</sup>, or resuspend  
406 in the hydrogel for 3D casting. For two-dimensional differentiation, the committed cells are kept  
407 in growth media (SKM02, AMSbiokit) supplemented with Doxycycline 200ng/ml for 2 days and  
408 then switched to differentiation media (SKM03 plus, AMSbiokit) supplemented with Doxycyclin  
409 200 ng/ml for additional 5 days. Human immortalized fibroblasts from control (AB1191) and DMD  
410 patient (AB1024) were generated and obtained from Myobank-AFM of Myology Institute. Ctr and

411 DMD human immortalized fibroblasts, used in co-culture with hiPSC in 3D MYOtissues, were  
412 maintained in culture in 20% FBS DMEM Glutamax supplemented medium.

413

#### 414 **Generation of MYOtissues**

415 MYOtissues from iPSC were generated adapting the protocol described for engineered heart tissue  
416 (67). Specifically,  $1.25 \times 10^6$  iPSC-committed (24 hours after induction with Doxycycline) are  
417 resuspended in 77  $\mu$ l of growth media supplemented with hES cell Recovery (Stemgent) and  
418 molded in hydrogel composed by 40  $\mu$ l of Bovine Collagen solution 6mg/ml (Sigma-Aldrich), 17.8  
419  $\mu$ l of Matrigel Growth Factor reduced (Corning) 10% v/v 3), 40  $\mu$ l 2X DMEM (Gibco) 4) and 5.2  
420  $\mu$ l of NaOH 1.5N 5). For the generation of MYOtissues including Fibroblasts,  $1.25 \times 10^5$  (1:10)  
421 immortalized fibroblasts are included in the iPSC-committed mix during hydrogel preparation.

422 The hydrogels are casted into 48-well plate TM5 MyrPlate (Myriamed), containing in each well a  
423 pair of flexible poles (static stretchers) that supports the growth of the engineered tissue in a ring  
424 shape. After 1 hour of polymerization at 37°C, media is added for 24 hours. At day 2 of the 3D,  
425 growth media (SKM02, AMSbiokit) is replaced by differentiation media (SKM03plus,  
426 AMSbiokit) and changed every day until day14.

427

#### 428 **Muscle force analysis**

429 Functional analyses were carried out at day 14 after 3D casting. Contraction experiments were  
430 performed using the MyoDynamics Muscle Strip System 840 MD (DMT Technologies) and CS4  
431 stimulator (DMT Technologies). All functional analysis were performed at 37°C, 5% CO<sub>2</sub> 95%  
432 O<sub>2</sub>, in Tyrode's solution supplemented with 25 mM NaHCO<sub>3</sub>. Optimal muscle length was  
433 determined by gradually stretching the muscle until there was no further increase in the twitch  
434 tension. Functional tests were performed under isometric and eccentric conditions. MYOtissues  
435 were electrically stimulated with 250 pulses of 30V, 4ms width at the 125Hz of frequency for both  
436 isometric and eccentric contractions. For eccentric analysis, organoids were 1 mm stretched at the  
437 6.5 cm/s during the muscular contraction. Each artificial tissue was subjected to 1 isometric  
438 contraction, 10 eccentric contractions and 1 isometric contraction. Data collection and analysis was  
439 done by PowerLab device and LabChart software (AD instruments) respectively. Fatigue is  
440 represented as percentage drop force between the first and the last isometric contraction. Where  
441 indicated, force is indirectly normalized for the CSA (Cross Section Area) calculated as muscle  
442 force (mN) x Lo (mm) x density (mg/mm<sup>3</sup>)/weight (mg) and expressed as mN/mm<sup>2</sup>. Muscle density  
443 is experimentally determined as 2.089 mg/mm<sup>3</sup>.

444



445 **Electron Microscopy studies**

446  
447 Electron microscopy analysis was prospectively performed on MYOtissue specimens that were  
448 fixed with glutaraldehyde (2.5%, pH 7.4), post fixed with osmium tetroxide (2%), dehydrated in a  
449 graded series of ethanol ranging from 30% to absolute solution and embedded in resin (EMBed-  
450 812, Electron Microscopy Sciences, USA). Ultra-thin sections from at least four blocks from WT  
451 iPSC-derived Organoids in presence or absence of WT fibroblasts were stained with uranyl acetate  
452 and lead citrate. The grids were observed using a “JEOL 1400 Flash” electron microscope (120  
453 kV) and were photo documented using a Xarosa camera (Soft Imaging System, France).

454

455 **Immunofluorescence**

456 MYOtissues are fixed if 4% methanol-free PFA overnight at day 14. For whole mount staining,  
457 fixed MYOtissues were permeabilized, stained and dehydrated with the MACS clearing kit  
458 (Miltenyi) accordingly to manufacturer’s instructions. Whole mount-stained organoids are then  
459 imaged with confocal microscope (LEICA STED SP8) at 10X magnification.

460 For staining on transversal or longitudinal sections, fixed MYOtissues are dehydrated with a  
461 gradient of sucrose (7.5%-30%) over-day and embedded in OCT matrix in plastic mold. After 24  
462 hr, embedded organoids are processed with the cryostat (LEICA) with 15 µm thick sections. Slices  
463 were then dried and fixed again with 4% methanol-free PFA (Invitrogen). Fixed sections are then  
464 blocked with serum cocktail (5% Goat serum and 5% Fetal bovine serum), before being stained  
465 overnight at +4°C with primary antibody. After that, slices are washed three times in PBS and  
466 hybridized with AlexaFluor secondary antibody accordingly to the host species of the first  
467 antibody. Stained slides were then covered with Fluoromont + Dapi and glass slide 1.5H. For  
468 imaging, sections are scanned with AxioScan microscope and confocal Leica SP8. FIJI and  
469 CellPose was used for images analysis. Myotube alignment was determined by angles  
470 measurement function (FIJI). Myotubes circularity was determined by custom FIJI script. Briefly,  
471 myotubes cross section area was first segmented by pre-trained Cellpose2 *cyto2* model (68) and  
472 then converted into Regions of Interest (ROIs) by *Labels\_To\_Rois.py* plugin (69) for subsequent  
473 quantification on FIJI (Ferret diameters X and Y).

474

475 **Gene expression analysis**

476 For gene expression analysis, RNA was isolated from MYOtissues by RNeasy micro kit  
477 (QIAGEN) accordingly to manufacturer’s instructions, controlled and quantify by Nanodrop. 0.5-  
478 1µg of RNA was retro-transcribed to cDNA thanks to the RevertAid H Minus First Strand cDNA

479 Synthesis Kit (Invitrogen). Droplet digital PCR was performed to assess the expression of  
480 myogenic factors (MyoD, Myh2, Myh7, MCK), of fibrotic markers (Col1A, Fn1) and  $\mu$ Dystrophin,  
481 thanks to the QX200™ ddPCR™ EvaGreen Supermix (Biorad). Gene expression results in copy/ $\mu$ l  
482 are represented as fold change to the expression of MyoD normalized for GAPDH housekeeping  
483 gene.

484

#### 485 **Biomarker analysis from conditioned media**

486 Secretome analysis was performed using the MILLIPLEX® Multiplex Assays Using Luminex®  
487 Technology (Millipore), accordingly to manufacturer's instructions.

488

#### 489 **AAV production and organoids infection**

490 Recombinant AAV were produced as previously described (70) using AAV9 serotype. Purification  
491 was performed using affinity chromatography and titration was done by ddPCR using ITRs  
492 primers. For optimization of infection, an AAV9-CMV-GFP construct was used. The micro-  
493 dystrophin transgene used in the study, under the control of spc512 promoter, was an optimized  
494 version of construct used for GENETHON's preclinical investigation and clinical trial (71), with  
495 deletion from spectrin-like repeats 4 to 23 and full C-terminal truncation, here referred as  $\mu$ Dys.  
496 Infection in organoids was performed delivering the AAV9 particles diluted into the differentiation  
497 media at day 7, at two different doses: 1E+10 vg/organoids (low dose) and 5E+10 vg/organoids  
498 (high dose). Media was replaced after 24 hr from the infection and changed daily until day 14.

499

#### 500 **Viral copy number analysis**

501 Viral DNA was extracted from mature MYO tissues by NucleoMag Pathogen kit (Macherey Nagel)  
502 using Kingfisher instrument (ThermoFisher). DNA yield and purity was assessed by Nanodrop;  
503 VCN (viral copy number) was identified by droplet digital PCR using supermix for probe (Biorad).  
504 Results are shown as copy number variation using P0 as reference DNA.

505

#### 506 **Capillary western blot analysis**

507 MYO tissues proteins were extracted in RIPA buffer supplemented with Protease Inhibitor Cocktail  
508 EDTA-free (Roche) and Benzonase by homogenization. Total proteins were then quantified by  
509 BCA method, thanks to the Pierce BCA protein assay kit (Invitrogen) accordingly to  
510 manufacturer's instructions. Protein detection has been performed by capillary western blot, thanks  
511 to the JESS protein simple (Bio-technique), accordingly to manufacturer's directions. Micro-

512 dystrophin detection has been performed by the antibody DysB (NCL-DYSB, Leica, 1:20) and its  
513 expression has been quantified by total protein normalization.

514

### 515 **Statistical analysis**

516 All data were analyzed by GraphPad Prism 9.5.1 software. Error bars on plots represent the  
517 standard error of the mean (SEM). Statistical significance was determined by either one-way or  
518 two-way analysis of variance (ANOVA) with Tukey's correction for multiple comparison tests.  
519 Results were considered significant at  $p < 0.05$ .

520 **Acknowledgments**

521 We express our gratitude to Rene Hummel (DMT), Guillaume Tanniou, and Nicolas Guerchet  
522 for their invaluable technical support in muscle force evaluation. We also extend our appreciation  
523 to Jérémie for the assistance in imaging and to the histology team for their technical expertise.  
524 Finally, we would like to thank Frederique Magdinier for generously providing the DMD iPSC  
525 dEx45 and Ctr1 iPSC.

526 **Funding:** This study was financially supported by the Institut National de la Sante et de la  
527 Recherche Medicale (INSERM)

528

529 **Author contributions:**

530 SA and LP designed the experiments. LP performed the majority of the experiments, including  
531 iPSC culture, organoid generation, imaging and muscle force analysis. AJ analyzed conditioned  
532 media biomarkers and performed secretome analysis. MM contributed to muscle force analysis.  
533 RE and GB performed electron microscopy analysis. AB generated and provided the  
534 immortalized human fibroblasts. SA and LP performed data analysis and figures preparation. SA  
535 conceived, supervised the project, and wrote the manuscript. All authors discussed results. SA,  
536 LP, DI and IR reviewed and edited the manuscript reviewed, and edited the manuscript.

537

538 **Competing interests:** All other authors declare they have no competing interests.

539

540 **Data and materials availability:** (MTAs). All data are available in the main text or the  
541 supplementary materials. The DMD-iPSC dEx8-9 and isogenic corrected control (iPSC dEx6-9)  
542 were provided by Dr Eric Olson while the Ctr2 iPSC line by I-Stem, upon MTA.

543

544

545 **References**

- 546 1. Mendell JR, Shilling C, Leslie ND, Flanigan KM, Al-Dahhak R, Gastier-Foster J, et al.  
547 Evidence-based path to newborn screening for Duchenne muscular dystrophy. *Ann*  
548 *Neurol* [Internet]. 2012 Mar [cited 2022 Oct 13];71(3):304–13. Available from:  
549 <https://pubmed.ncbi.nlm.nih.gov/22451200/>
- 550 2. Ervasti JM, Campbell KP. A role for the dystrophin-glycoprotein complex as a  
551 transmembrane linker between laminin and actin. *J Cell Biol* [Internet]. 1993 [cited  
552 2023 Apr 18];122(4):809–23. Available from:  
553 <https://pubmed.ncbi.nlm.nih.gov/8349731/>
- 554 3. Petrof BJ, Shrager JB, Stedman HH, Kelly AM, Sweeney HL. Dystrophin protects the  
555 sarcolemma from stresses developed during muscle contraction. *Proc Natl Acad Sci U*  
556 *S A* [Internet]. 1993 Apr 15 [cited 2023 Apr 18];90(8):3710–4. Available from:  
557 <https://pubmed.ncbi.nlm.nih.gov/8475120/>
- 558 4. Hoffman EP, Brown RH, Kunkel LM. Dystrophin: the protein product of the Duchenne  
559 muscular dystrophy locus. *Cell* [Internet]. 1987 Dec 24 [cited 2022 Oct 13];51(6):919–  
560 28. Available from: <https://pubmed.ncbi.nlm.nih.gov/3319190/>
- 561 5. Hoffman EP. The discovery of dystrophin, the protein product of the Duchenne  
562 muscular dystrophy gene. *FEBS J* [Internet]. 2020 Sep 1 [cited 2021 Mar  
563 5];287(18):3879–87. Available from: <https://pubmed.ncbi.nlm.nih.gov/32608079/>
- 564 6. Hoffman EP, Brown RH, Kunkel LM. Dystrophin: the protein product of the Duchenne  
565 muscular dystrophy locus. *Cell* [Internet]. 1987 Dec 24 [cited 2023 Apr 18];51(6):919–  
566 28. Available from: <https://pubmed.ncbi.nlm.nih.gov/3319190/>
- 567 7. Elangkovan N, Dickson G. Gene Therapy for Duchenne Muscular Dystrophy. *J*  
568 *Neuromuscul Dis* [Internet]. 2021 [cited 2023 Apr 20];8(Suppl 2):S303. Available  
569 from: [/pmc/articles/PMC8673537/](https://pubmed.ncbi.nlm.nih.gov/36673537/)
- 570 8. Gao QQ, McNally EM. The dystrophin complex: Structure, function, and implications  
571 for therapy. *Compr Physiol* [Internet]. 2015 Jul 1 [cited 2021 Mar 5];5(3):1223–39.  
572 Available from: <https://pubmed.ncbi.nlm.nih.gov/26140716/>
- 573 9. Davies KE, Nowak KJ. Molecular mechanisms of muscular dystrophies: old and new  
574 players. *Nat Rev Mol Cell Biol* [Internet]. 2006 Oct 23 [cited 2023 Apr 20];7(10):762–  
575 73. Available from: <https://pubmed.ncbi.nlm.nih.gov/16971897/>
- 576 10. Ennen JP, Verma M, Asakura A. Vascular-targeted therapies for Duchenne muscular  
577 dystrophy. *Skelet Muscle* [Internet]. 2013 Apr 23 [cited 2023 Apr 20];3(1). Available  
578 from: <https://pubmed.ncbi.nlm.nih.gov/23618411/>

- 579 11. Porter JD, Khanna S, Kaminski HJ, Sunil Rao J, Merriam AP, Richmonds CR, et al. A  
580 chronic inflammatory response dominates the skeletal muscle molecular signature in  
581 dystrophin-deficient mdx mice. *Hum Mol Genet* [Internet]. 2002 Feb 1 [cited 2023 Jun  
582 27];11(3):263–72. Available from: <https://pubmed.ncbi.nlm.nih.gov/11823445/>
- 583 12. Amor F, Vu Hong A, Corre G, Sanson M, Suel L, Blaie S, et al. Cholesterol  
584 metabolism is a potential therapeutic target in Duchenne muscular dystrophy. *J*  
585 *Cachexia Sarcopenia Muscle* [Internet]. 2021 Jun 1 [cited 2023 Jul 5];12(3):677–93.  
586 Available from: <https://pubmed.ncbi.nlm.nih.gov/34037326/>
- 587 13. Caputo L, Granados A, Lenzi J, Rosa A, Ait-Si-Ali S, Puri PL, et al. Acute conversion  
588 of patient-derived Duchenne muscular dystrophy iPSC into myotubes reveals  
589 constitutive and inducible over-activation of TGF $\beta$ -dependent pro-fibrotic signaling.  
590 *Skelet Muscle*. 2020 May 2;10(1).
- 591 14. Wynn TA. Cellular and molecular mechanisms of fibrosis. *J Pathol*. 2008  
592 Jan;214(2):199–210.
- 593 15. Kharraz Y, Guerra J, Pessina P, Serrano AL, Muñoz-Cánoves P. Understanding the  
594 process of fibrosis in Duchenne muscular dystrophy. *Biomed Res Int* [Internet]. 2014  
595 [cited 2018 Sep 7];2014:965631. Available from:  
596 <http://www.hindawi.com/journals/bmri/2014/965631/>
- 597 16. Mendell JR, Al-Zaidy SA, Rodino-Klapac LR, Goodspeed K, Gray SJ, Kay CN, et al.  
598 duan. *Mol Ther* [Internet]. 2021 Feb 3 [cited 2023 Apr 18];29(2):464–88. Available  
599 from: <https://pubmed.ncbi.nlm.nih.gov/33309881/>
- 600 17. Aguti S, Malerba A, Zhou H. The progress of AAV-mediated gene therapy in  
601 neuromuscular disorders. *Expert Opin Biol Ther* [Internet]. 2018 Jun 3 [cited 2023 Apr  
602 18];18(6):681–93. Available from: <https://pubmed.ncbi.nlm.nih.gov/29781327/>
- 603 18. Duan D. Systemic AAV Micro-dystrophin Gene Therapy for Duchenne Muscular  
604 Dystrophy. *Mol Ther* [Internet]. 2018 Oct 3 [cited 2023 Apr 18];26(10):2337–56.  
605 Available from: <https://linkinghub.elsevier.com/retrieve/pii/S1525001618303368>
- 606 19. Le Guiner C, Servais L, Montus M, Larcher T, Fraysse B, Moullec S, et al. Long-term  
607 microdystrophin gene therapy is effective in a canine model of Duchenne muscular  
608 dystrophy. *Nat Commun* [Internet]. 2017 Jul 25 [cited 2021 Mar 1];8. Available from:  
609 <https://pubmed.ncbi.nlm.nih.gov/28742067/>
- 610 20. Elankovan N, Dickson G. Gene Therapy for Duchenne Muscular Dystrophy. *J*  
611 *Neuromuscul Dis* [Internet]. 2021 [cited 2023 Apr 20];8(s2):S303–16. Available from:  
612 <https://pubmed.ncbi.nlm.nih.gov/34511510/>



- 613 21. Harper SQ, Hauser MA, DelloRusso C, Duan D, Crawford RW, Phelps SF, et al.  
614 Modular flexibility of dystrophin: implications for gene therapy of Duchenne muscular  
615 dystrophy. *Nat Med* [Internet]. 2002 [cited 2023 Apr 20];8(3):253–61. Available from:  
616 <https://pubmed.ncbi.nlm.nih.gov/11875496/>
- 617 22. Wang B, Li J, Xiao X. Adeno-associated virus vector carrying human minidystrophin  
618 genes effectively ameliorates muscular dystrophy in mdx mouse model. *Proc Natl*  
619 *Acad Sci U S A* [Internet]. 2000 Dec 5 [cited 2023 Apr 20];97(25):13714–9. Available  
620 from: <https://pubmed.ncbi.nlm.nih.gov/11095710/>
- 621 23. Duan D. Duchenne Muscular Dystrophy Gene Therapy in 2023: Status, Perspective,  
622 and Beyond. *Hum Gene Ther* [Internet]. 2023 May 1 [cited 2023 Jul 6];34(9–10):345–  
623 9. Available from: <https://pubmed.ncbi.nlm.nih.gov/37219994/>
- 624 24. Birch SM, Lawlor MW, Conlon TJ, Guo LJ, Crudele JM, Hawkins EC, et al.  
625 Assessment of systemic AAV-microdystrophin gene therapy in the GRMD model of  
626 Duchenne muscular dystrophy. *Sci Transl Med* [Internet]. 2023 Jan 4 [cited 2023 Jun  
627 14];15(677):eabo1815. Available from: <https://pubmed.ncbi.nlm.nih.gov/36599002/>
- 628 25. Bostick B, Shin JH, Yue Y, Wasala NB, Lai Y, Duan D. AAV micro-dystrophin gene  
629 therapy alleviates stress-induced cardiac death but not myocardial fibrosis in >21-m-  
630 old mdx mice, an end-stage model of Duchenne muscular dystrophy cardiomyopathy. *J*  
631 *Mol Cell Cardiol* [Internet]. 2012 Aug [cited 2023 Jun 14];53(2):217–22. Available  
632 from: <https://pubmed.ncbi.nlm.nih.gov/22587991/>
- 633 26. Takahashi K, Tanabe K, Ohnuki M, Narita M, Ichisaka T, Tomoda K, et al. Induction  
634 of Pluripotent Stem Cells from Adult Human Fibroblasts by Defined Factors. *Cell*  
635 [Internet]. 2007 Nov 30 [cited 2021 Mar 5];131(5):861–72. Available from:  
636 <https://pubmed.ncbi.nlm.nih.gov/18035408/>
- 637 27. Tornabene P, Trapani I, Minopoli R, Centrulo M, Lupo M, De Simone S, et al. Intein-  
638 mediated protein trans-splicing expands adeno-associated virus transfer capacity in the  
639 retina. *Sci Transl Med* [Internet]. 2019 [cited 2023 Mar 30];11(492). Available from:  
640 <https://pubmed.ncbi.nlm.nih.gov/31092694/>
- 641 28. Clevers H. Modeling Development and Disease with Organoids. *Cell* [Internet]. 2016  
642 Jun 16 [cited 2023 Apr 18];165(7):1586–97. Available from:  
643 <https://pubmed.ncbi.nlm.nih.gov/27315476/>
- 644 29. Hofer M, Lutolf MP. Engineering organoids. *Nat Rev Mater* [Internet]. 2021 May 1  
645 [cited 2023 Apr 18];6(5):402–20. Available from:  
646 <https://pubmed.ncbi.nlm.nih.gov/33623712/>

- 647 30. Kruczek K, Qu Z, Gentry J, Fadl BR, Gieser L, Hiriyanna S, et al. Gene Therapy of  
648 Dominant CRX-Leber Congenital Amaurosis using Patient Stem Cell-Derived Retinal  
649 Organoids. *Stem cell reports* [Internet]. 2021 Feb 9 [cited 2023 Apr 19];16(2):252–63.  
650 Available from: <https://pubmed.ncbi.nlm.nih.gov/33513359/>
- 651 31. Khabou H, Garita-Hernandez M, Chaffiol A, Reichman S, Jaillard C, Brazhnikova E,  
652 et al. Noninvasive gene delivery to foveal cones for vision restoration. *JCI insight*  
653 [Internet]. 2018 Jan 25 [cited 2023 Apr 19];3(2). Available from:  
654 <https://pubmed.ncbi.nlm.nih.gov/29367457/>
- 655 32. Garita-Hernandez M, Routet F, Guibbal L, Khabou H, Toualbi L, Riancho L, et al.  
656 AAV-Mediated Gene Delivery to 3D Retinal Organoids Derived from Human Induced  
657 Pluripotent Stem Cells. *Int J Mol Sci* [Internet]. 2020 Feb 1 [cited 2023 Mar 30];21(3).  
658 Available from: <https://pubmed.ncbi.nlm.nih.gov/32028585/>
- 659 33. Garita-Hernandez M, Routet F, Guibbal L, Khabou H, Toualbi L, Riancho L, et al.  
660 AAV-Mediated Gene Delivery to 3D Retinal Organoids Derived from Human Induced  
661 Pluripotent Stem Cells. *Int J Mol Sci* [Internet]. 2020 Feb 1 [cited 2023 Apr 19];21(3).  
662 Available from: <https://pubmed.ncbi.nlm.nih.gov/32028585/>
- 663 34. Ramamurthy RM, Atala A, Porada CD, Almeida-Porada G. Organoids and  
664 microphysiological systems: Promising models for accelerating AAV gene therapy  
665 studies. *Front Immunol* [Internet]. 2022 Sep 26 [cited 2023 Apr 19];13. Available  
666 from: <https://pubmed.ncbi.nlm.nih.gov/36225917/>
- 667 35. Chemello F, Chai AC, Li H, Rodriguez-Caycedo C, Sanchez-Ortiz E, Atmanli A, et al.  
668 Precise correction of Duchenne muscular dystrophy exon deletion mutations by base  
669 and prime editing. *Sci Adv* [Internet]. 2021 Apr 1 [cited 2023 Apr 20];7(18). Available  
670 from: <https://pubmed.ncbi.nlm.nih.gov/33931459/>
- 671 36. Shin MK, Bang JS, Lee JE, Tran HD, Park G, Lee DR, et al. Generation of Skeletal  
672 Muscle Organoids from Human Pluripotent Stem Cells to Model Myogenesis and  
673 Muscle Regeneration. *Int J Mol Sci* [Internet]. 2022 May 1 [cited 2023 Apr 20];23(9).  
674 Available from: [/pmc/articles/PMC9103168/](https://pubmed.ncbi.nlm.nih.gov/36225917/)
- 675 37. Pinton L, Khedr M, Lionello VM, Sarcar S, Maffioletti SM, Dastidar S, et al. 3D  
676 human induced pluripotent stem cell-derived bioengineered skeletal muscles for tissue,  
677 disease and therapy modeling. *Nat Protoc* [Internet]. 2023 [cited 2023 Apr 18];18(4).  
678 Available from: <https://pubmed.ncbi.nlm.nih.gov/36792780/>
- 679 38. Rao L, Qian Y, Khodabukus A, Ribar T, Bursac N. Engineering human pluripotent  
680 stem cells into a functional skeletal muscle tissue. *Nat Commun* [Internet]. 2018 Dec 9

- 681 [cited 2018 Oct 16];9(1):126. Available from: [http://www.nature.com/articles/s41467-](http://www.nature.com/articles/s41467-017-02636-4)  
682 017-02636-4
- 683 39. Shahriyari M, Islam MR, Sakib SM, Rinn M, Rika A, Krüger D, et al. Engineered  
684 skeletal muscle recapitulates human muscle development, regeneration and dystrophy.  
685 *J Cachexia Sarcopenia Muscle*. 2022 Dec 1;13(6):3106–21.
- 686 40. Albin S, Coutinho P, Malecova B, Giordani L, Savchenko A, Forcales SV, et al.  
687 Epigenetic Reprogramming of Human Embryonic Stem Cells into Skeletal Muscle  
688 Cells and Generation of Contractile Myospheres. *Cell Rep*. 2013;3(3):661–70.
- 689 41. Albin S, Puri PL. Generation of Myospheres From hESCs by Epigenetic  
690 Reprogramming. *J Vis Exp* [Internet]. 2014;(88). Available from:  
691 [http://www.jove.com/video/51243/generation-of-myospheres-from-hescs-by-](http://www.jove.com/video/51243/generation-of-myospheres-from-hescs-by-epigenetic-reprogramming)  
692 [epigenetic-reprogramming](http://www.jove.com/video/51243/generation-of-myospheres-from-hescs-by-epigenetic-reprogramming)
- 693 42. Li M, Dickinson CE, Finkelstein EB, Neville CM, Sundback CA. The role of  
694 fibroblasts in self-assembled skeletal muscle. *Tissue Eng Part A* [Internet]. 2011 Nov 1  
695 [cited 2023 Apr 1];17(21–22):2641–50. Available from:  
696 <https://pubmed.ncbi.nlm.nih.gov/21657983/>
- 697 43. Santos GL, Meyer T, Tiburcy M, Degraeve A, Zimmermann WH, Lutz S. Fibroblast  
698 Derived Human Engineered Connective Tissue for Screening Applications. *J Vis Exp*  
699 [Internet]. 2021 Aug 1 [cited 2023 Apr 18];2021(174). Available from:  
700 <https://pubmed.ncbi.nlm.nih.gov/34487119/>
- 701 44. Kühl U, Öcalan M, Timpl R, Mayne R, Hay E, von der Mark K. Role of muscle  
702 fibroblasts in the deposition of type-IV collagen in the basal lamina of myotubes.  
703 *Differentiation* [Internet]. 1984 [cited 2023 Apr 1];28(2):164–72. Available from:  
704 <https://pubmed.ncbi.nlm.nih.gov/6396135/>
- 705 45. Mathew SJ, Hansen JM, Merrell AJ, Murphy MM, Lawson JA, Hutcheson DA, et al.  
706 Connective tissue fibroblasts and Tcf4 regulate myogenesis. *Development* [Internet].  
707 2011 Jan 15 [cited 2023 Apr 7];138(2):371–84. Available from:  
708 <https://pubmed.ncbi.nlm.nih.gov/21177349/>
- 709 46. Tiburcy M, Meyer T, Soong PL, Zimmermann WH. Collagen-based engineered heart  
710 muscle. *Methods Mol Biol* [Internet]. 2014 [cited 2023 Apr 20];1181:167–76.  
711 Available from: <https://pubmed.ncbi.nlm.nih.gov/25070336/>
- 712 47. Rao N, Evans S, Stewart D, Spencer KH, Sheikh F, Hui EE, et al. Fibroblasts influence  
713 muscle progenitor differentiation and alignment in contact independent and dependent  
714 manners in organized co-culture devices. *Biomed Microdevices* [Internet]. 2013 Feb

- 715 [cited 2023 Apr 25];15(1):161. Available from: [/pmc/articles/PMC3537877/](https://pubmed.ncbi.nlm.nih.gov/30590054/)
- 716 48. Bersini S, Gilardi M, Ugolini GS, Sansoni V, Talò G, Perego S, et al. Engineering an  
717 Environment for the Study of Fibrosis: A 3D Human Muscle Model with Endothelium  
718 Specificity and Endomysium. *Cell Rep* [Internet]. 2018 Dec 26 [cited 2023 Apr  
719 24];25(13):3858-3868.e4. Available from: <https://pubmed.ncbi.nlm.nih.gov/30590054/>
- 720 49. Minato K, Yoshimoto Y, Kurosawa T, Watanabe K, Kawashima H, Ikemoto-Uezumi  
721 M, et al. Measurement of Lateral Transmission of Force in the Extensor Digitorum  
722 Longus Muscle of Young and Old Mice. *Int J Mol Sci* [Internet]. 2021 Nov 1 [cited  
723 2023 Apr 28];22(22). Available from: [/pmc/articles/PMC8623005/](https://pubmed.ncbi.nlm.nih.gov/31511953/)
- 724 50. Erdogan BR, Karaomerlioglu I, Yesilyurt ZE, Ozturk N, Muderrisoglu AE, Michel  
725 MC, et al. Normalization of organ bath contraction data for tissue specimen size: does  
726 one approach fit all? *Naunyn Schmiedebergs Arch Pharmacol* [Internet]. 2020 Feb 1  
727 [cited 2023 Apr 28];393(2):243–51. Available from:  
728 <https://pubmed.ncbi.nlm.nih.gov/31511953/>
- 729 51. Mann CJ, Perdiguero E, Kharraz Y, Aguilar S, Pessina P, Serrano AL, et al. Aberrant  
730 repair and fibrosis development in skeletal muscle. *Skelet Muscle* [Internet]. 2011 May  
731 4 [cited 2023 Apr 28];1(1):21. Available from: [/pmc/articles/PMC3156644/](https://pubmed.ncbi.nlm.nih.gov/34019816/)
- 732 52. Chang ACY, Pardon G, Chang ACH, Wu H, Ong SG, Eguchi A, et al. Increased tissue  
733 stiffness triggers contractile dysfunction and telomere shortening in dystrophic  
734 cardiomyocytes. *Stem cell reports* [Internet]. 2021 Sep 14 [cited 2023 Apr  
735 20];16(9):2169–81. Available from: <https://pubmed.ncbi.nlm.nih.gov/34019816/>
- 736 53. Kyrychenko V, Kyrychenko S, Tiburcy M, Shelton JM, Long C, Schneider JW, et al.  
737 Functional correction of dystrophin actin binding domain mutations by genome editing.  
738 *JCI insight* [Internet]. 2017 Sep 21 [cited 2023 Apr 3];2(18). Available from:  
739 <https://pubmed.ncbi.nlm.nih.gov/28931764/>
- 740 54. Childers MK, Okamura CS, Bogan DJ, Bogan JR, Petroski GF, McDonald K, et al.  
741 Eccentric contraction injury in dystrophic canine muscle. *Arch Phys Med Rehabil*  
742 [Internet]. 2002 Nov 1 [cited 2023 Apr 3];83(11):1572–8. Available from:  
743 <https://pubmed.ncbi.nlm.nih.gov/12422328/>
- 744 55. Manini A, Abati E, Nuredini A, Corti S, Comi G Pietro. Adeno-Associated Virus  
745 (AAV)-Mediated Gene Therapy for Duchenne Muscular Dystrophy: The Issue of  
746 Transgene Persistence. *Front Neurol* [Internet]. 2021 Jan 5 [cited 2023 Apr  
747 25];12:814174. Available from: [/pmc/articles/PMC8797140/](https://pubmed.ncbi.nlm.nih.gov/38797140/)
- 748 56. Aguti S, Malerba A, Zhou H. The progress of AAV-mediated gene therapy in

- 749 neuromuscular disorders. *Expert Opin Biol Ther* [Internet]. 2018 Jun 3 [cited 2023 Apr  
750 25];18(6):681–93. Available from: <https://pubmed.ncbi.nlm.nih.gov/29781327/>
- 751 57. Pinton L, Khedr M, Lionello VM, Sarcar S, Maffioletti SM, Dastidar S, et al. 3D  
752 human induced pluripotent stem cell-derived bioengineered skeletal muscles for tissue,  
753 disease and therapy modeling. *Nat Protoc* [Internet]. 2023 [cited 2023 Apr 1];  
754 Available from: <https://pubmed.ncbi.nlm.nih.gov/36792780/>
- 755 58. Lapidos KA, Kakkar R, McNally EM. The dystrophin glycoprotein complex: signaling  
756 strength and integrity for the sarcolemma. *Circ Res* [Internet]. 2004 Apr 30 [cited 2023  
757 Jun 27];94(8):1023–31. Available from: <https://pubmed.ncbi.nlm.nih.gov/15117830/>
- 758 59. Rosenberg AS, Puig M, Nagaraju K, Hoffman EP, Villalta SA, Rao VA, et al. Immune-  
759 mediated pathology in Duchenne muscular dystrophy. *Sci Transl Med* [Internet]. 2015  
760 Aug 5 [cited 2018 Sep 7];7(299):299rv4–299rv4. Available from:  
761 <http://www.ncbi.nlm.nih.gov/pubmed/26246170>
- 762 60. Madden L, Juhas M, Kraus WE, Truskey GA, Bursac N. Bioengineered human  
763 myobundles mimic clinical responses of skeletal muscle to drugs. *Elife* [Internet]. 2015  
764 Jan 8 [cited 2023 Apr 13];4(4). Available from:  
765 <https://pubmed.ncbi.nlm.nih.gov/25575180/>
- 766 61. Rao L, Qian Y, Khodabukus A, Ribar T, Bursac N. Engineering human pluripotent  
767 stem cells into a functional skeletal muscle tissue. *Nat Commun* [Internet]. 2018 Dec 1  
768 [cited 2023 Apr 13];9(1). Available from: <https://pubmed.ncbi.nlm.nih.gov/29317646/>
- 769 62. Khodabukus A, Madden L, Prabhu NK, Koves TR, Jackman CP, Muoio DM, et al.  
770 Electrical stimulation increases hypertrophy and metabolic flux in tissue-engineered  
771 human skeletal muscle. *Biomaterials* [Internet]. 2018 Aug 31 [cited 2018 Oct 29];  
772 Available from: <http://www.ncbi.nlm.nih.gov/pubmed/30180985>
- 773 63. Barton ER, Lynch G, Khurana TS, Raymackers J-M, Dorchies O, Carlson G.  
774 Measuring isometric force of isolated mouse muscles in vitro. 2008;
- 775 64. Chal J, Oginuma M, Al Tanoury Z, Gobert B, Sumara O, Hick A, et al. Differentiation  
776 of pluripotent stem cells to muscle fiber to model Duchenne muscular dystrophy. *Nat*  
777 *Biotechnol* [Internet]. 2015 Sep 3 [cited 2018 Sep 7];33(9):962–9. Available from:  
778 <http://www.nature.com/articles/nbt.3297>
- 779 65. Al Tanoury Z, Zimmerman JF, Rao J, Sieiro D, McNamara HM, Cherrier T, et al.  
780 Prednisolone rescues Duchenne muscular dystrophy phenotypes in human pluripotent  
781 stem cell-derived skeletal muscle in vitro. *Proc Natl Acad Sci U S A* [Internet]. 2021  
782 Jul 13 [cited 2023 Apr 24];118(28). Available from:

- 783 <https://pubmed.ncbi.nlm.nih.gov/34260377/>
- 784 66. Saleh KK, Xi H, Switzler C, Skuratovsky E, Romero MA, Chien P, et al. Single cell  
785 sequencing maps skeletal muscle cellular diversity as disease severity increases in  
786 dystrophic mouse models. *iScience* [Internet]. 2022 Nov 18 [cited 2023 Jul 9];25(11).  
787 Available from: <http://www.cell.com/article/S258900422201687X/fulltext>
- 788 67. Tiburcy M, Meyer T, Liaw NY, Zimmermann WH. Generation of Engineered Human  
789 Myocardium in a Multi-well Format. *STAR Protoc* [Internet]. 2020 Jun 19 [cited 2023  
790 Apr 26];1(1). Available from: <https://pubmed.ncbi.nlm.nih.gov/33111083/>
- 791 68. Stringer C, Wang T, Michaelos M, Pachitariu M. Cellpose: a generalist algorithm for  
792 cellular segmentation. *Nat Methods* [Internet]. 2021 Jan 1 [cited 2023 Jun  
793 28];18(1):100–6. Available from: <https://pubmed.ncbi.nlm.nih.gov/33318659/>
- 794 69. Waisman A, Norris AM, Elías Costa M, Kopinke D. Automatic and unbiased  
795 segmentation and quantification of myofibers in skeletal muscle. *Sci Rep* [Internet].  
796 2021 Dec 1 [cited 2023 Jun 28];11(1). Available from:  
797 <https://pubmed.ncbi.nlm.nih.gov/34083673/>
- 798 70. Bourg N, Hong AV, Lostal W, Jaber A, Guerchet N, Tanniou G, et al. Co-  
799 Administration of Simvastatin Does Not Potentiate the Benefit of Gene Therapy in the  
800 mdx Mouse Model for Duchenne Muscular Dystrophy. *Int J Mol Sci* [Internet]. 2022  
801 Feb 1 [cited 2023 Jun 23];23(4). Available from:  
802 <https://pubmed.ncbi.nlm.nih.gov/35216132/>
- 803 71. Le Guiner C, Servais L, Montus M, Larcher T, Fraysse B, Moullec S, et al. Long-term  
804 microdystrophin gene therapy is effective in a canine model of Duchenne muscular  
805 dystrophy. *Nat Commun* [Internet]. 2017 Jul 25 [cited 2023 Mar 28];8. Available from:  
806 <https://pubmed.ncbi.nlm.nih.gov/28742067/>

807

## 808 **Acknowledgments**

809 We express our gratitude to Rene Hummel (DMT), Guillaume Tanniou, and Nicolas Guerchet  
810 for the invaluable technical support in muscle force evaluation. We also extend our appreciation to  
811 Jérémie for the assistance in imaging and to the histology team for their technical expertise. Finally,  
812 we would like to thank Frederique Magdinier for generously providing the DMD iPSC dEx45 and  
813 Ctr1 iPSC.



814 **MAIN FIGURES**

815

816 **Figure 1**

817

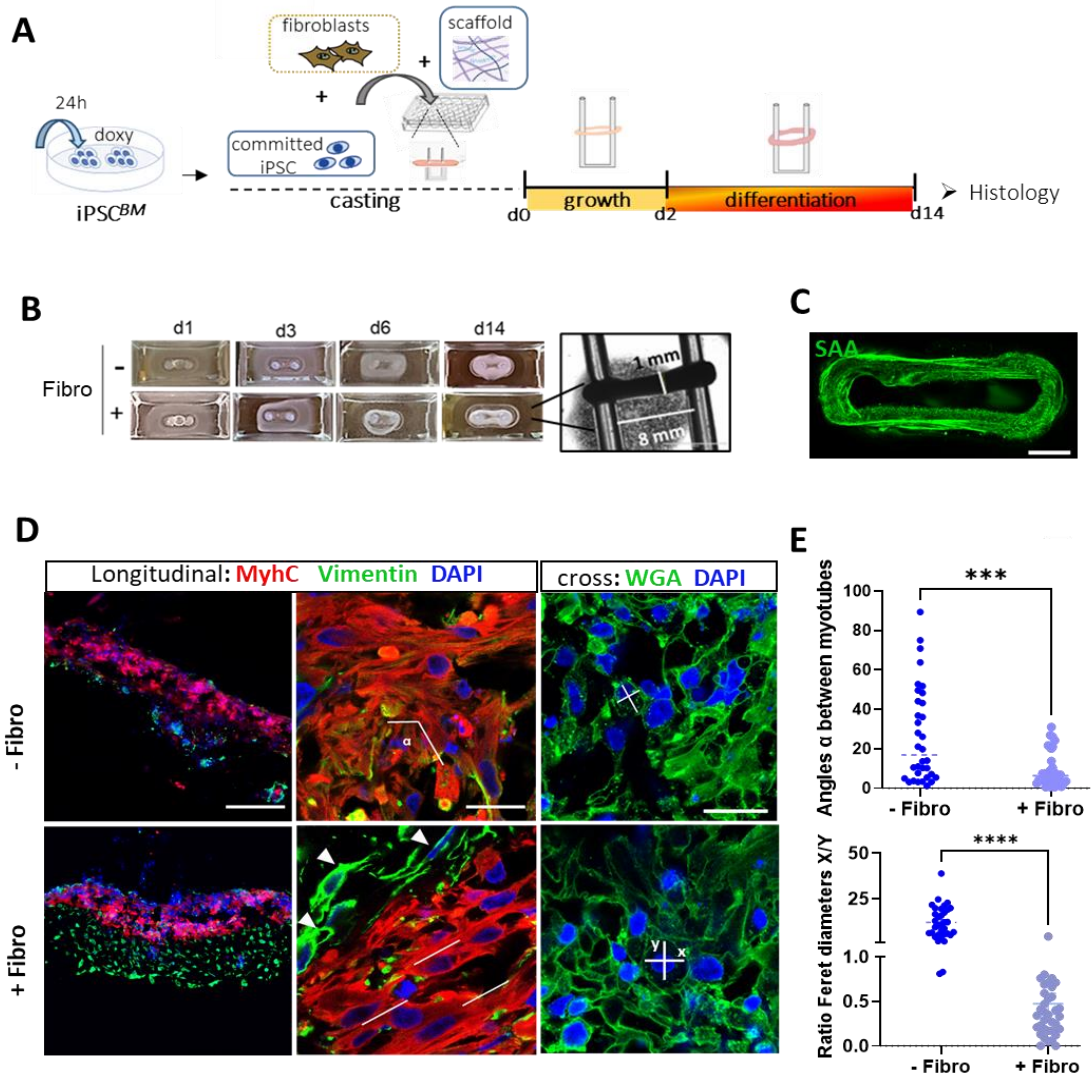

818

819 **Figure 1. Generation of iPSC-derived MYO tissues and impact of fibroblasts inclusion on muscle organization.**

820 (A) Scheme of the protocol used to generate muscle artificial tissues (MYO tissues) from iPSC committed towards

821 the myogenic lineage by 24h treatment with doxycycline for inducible expression of MyoD and BAF60C

822 transgenes (iPSC<sup>BM</sup>). Casting procedure included: committed iPSC, fibroblasts when indicated (+/-fibro) and a

823 collagen-based scaffold, within a 48 well plate equipped with silicon pillars. After 2 days in growth medium, the

824 3D structures were shifted in differentiation medium until day 14 for histological analysis. (B) Condensation

825 kinetics of MYO tissues +/-fibro. (C) Whole-mount staining of MYO tissues with Sarcomeric  $\alpha$ -Actinin (SAA) and

826 3D reconstruction of the ring-shaped constructs using confocal imaging. Scale bar: 1mm. (D) Representative

827 longitudinal and cross sections of MYO tissues +/- fibroblasts, immunostained for Myosin Heavy Chain (MyHC)

828 and Vimentin or for wheat germ agglutinin (WGA). Nuclei were visualized with DAPI. Scale bars 200 $\mu$ m (left

829 panel) and 10  $\mu$ m (middle and right panel). Arrows indicate fibroblasts recruited adjacently to the muscle fibers;

830 *a* is the angle formed between myotubes; lines indicate aligned myotubes, crosses represent X/Y myotubes  
831 diameters. **(E)** The alignment was calculated based on the angle ( $\alpha$ ) formed between myotubes ( $\alpha$  close to 0  
832 corresponds to aligned myotubes, while far from 0 corresponds to not aligned myotubes), while circularity from  
833 X/Y myotubes diameters ratio (ratio 1 circular, far from 1 not circular). Data were collected from 3 independent  
834 experiments with at least 3 replicates. Unpaired two-tailed t-test was used (\*\* $p \leq 0.01$ , \*\*\*\* $p \leq 0.0001$ ).  
835

836  
837  
838

**Figure 2**

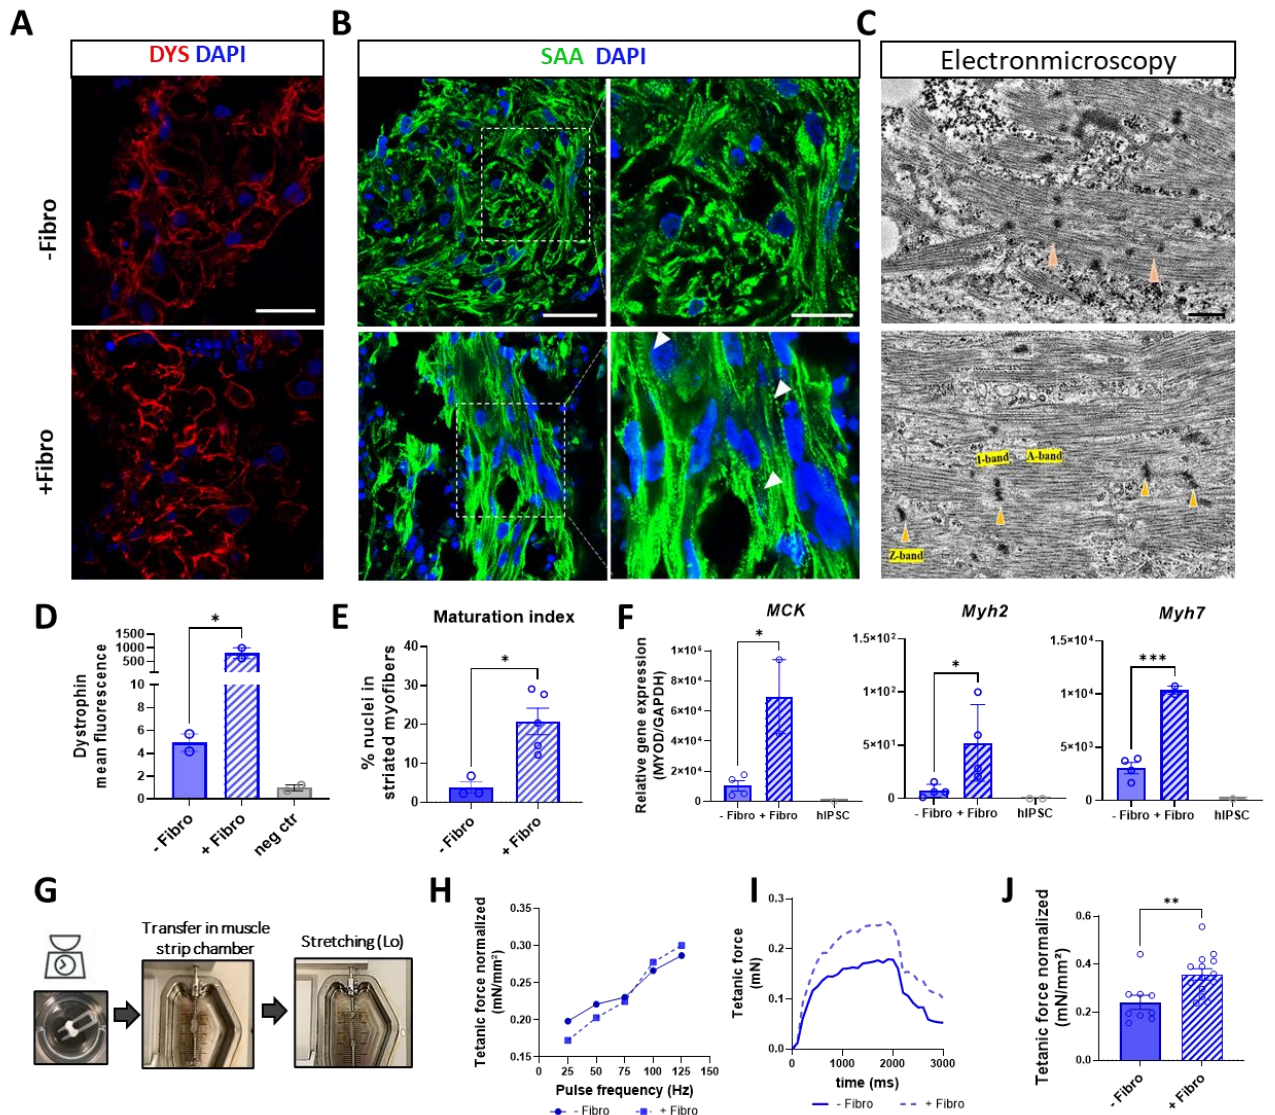

839  
840 **Figure 2. Structural and functional maturation in fibroblast-including MYOtissues.** (A) Representative  
841 transversal sections stained for Dystrophin. Scale bar: 40 $\mu$ m. Nuclei were visualized with DAPI (B)  
842 Representative longitudinal sections of MYOtissues +/- fibroblasts (fibro), immunostained for sarcomeric  $\alpha$ -  
843 Actinin (SAA). Scale bars: 40 $\mu$ m, enlargement 10 $\mu$ m. (C) Transmission electron microscopy images showing  
844 sarcomeric structures. Orange arrows: Z-lines. Scale bar: 500nm. (D) Dystrophin staining quantification  
845 represented as mean intensity fluorescence and expressed as fold change to the negative control (sections stained  
846 without first antibody). (E) Quantification of maturation index calculated as % of nuclei inside striated myofibers  
847 visualized by SAA staining. (F) Gene expression analysis of MCK, Myh2 and Myh7, reported as gene expression  
848 relative to MYOD expressing population (G) Contractile muscle force analysis of MYOtissues using a muscle-  
849 strip based organ bath system. Before placement in the strip chamber, MYOtissues were weighted, and optimal  
850 length (Lo) measured for normalization of force data (see methods). (H) Normalized force-frequency relationships

851 *in MYOtissues +/- fibro (n=2). (I) Representative tetanic force traces at optimal frequency (125 Hz) in MYOtissues*  
852 *+/- fibro. (J) Normalized tetanic force peak in MYOtissues +/- fibroblasts (n=8 to 15). Data are presented as*  
853 *means +/- SEM. Unpaired t test was applied for statistical analysis for maturation index (panel F) and for*  
854 *normalized tetanic force analysis (panel J). For all the other panels, One-way ANOVA statistical test was*  
855 *performed. (\* $p \leq 0.05$ , \*\* $p \leq 0.01$ , \*\*\* $p \leq 0.001$ , \*\*\*\* $p \leq 0.0001$ ).*

856



857

**Figure 3**

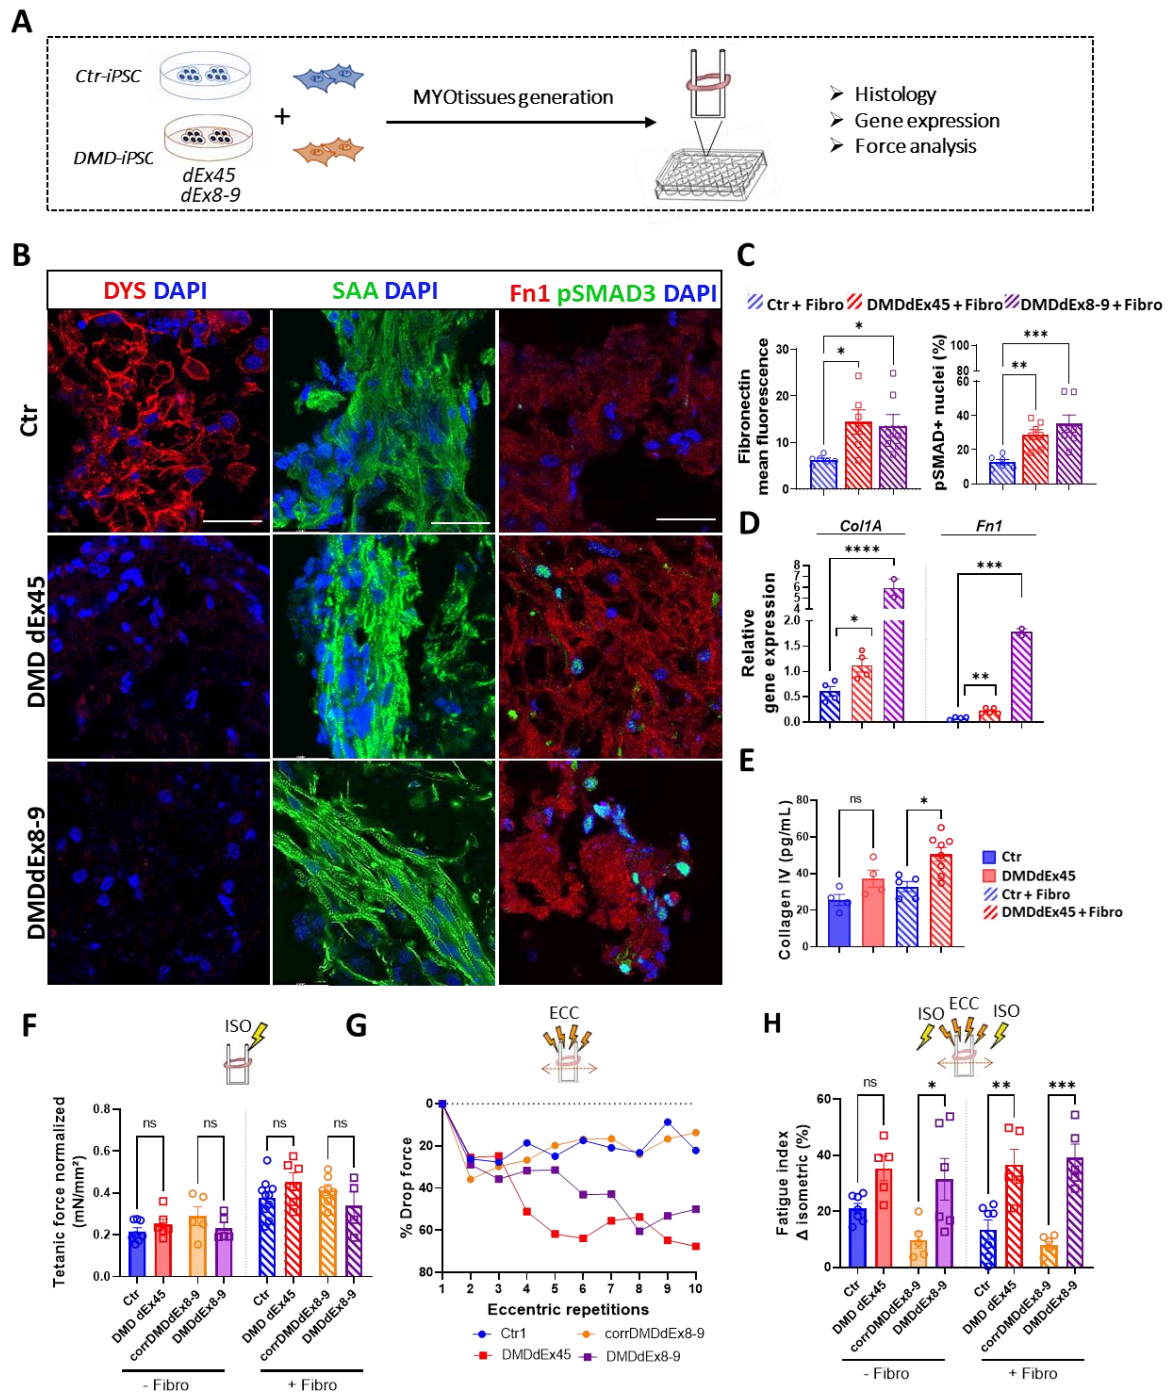

858

859 **Figure 3. DMD iPSC-MYOTissues including DMD fibroblasts exacerbate pathogenic hallmarks.** (A) Overview  
 860 of MYOTissues generation from control (Ctr) and DMD iPSC (dEX45 and dEx8-9) including ctr or dystrophic  
 861 fibroblasts respectively for histological characterization and gene expression analysis. (B) Immunostaining of  
 862 MYOTissues cross sections for Dystrophin (Dys) or Fibronectin (Fn1)/pSMAD3 and for SAA in longitudinal  
 863 sections. Scale bar: 40µm. (C) Quantification of Fn1 signal and % of pSMAD3 nuclei in Ctr and DMD  
 864 MYOTissues. (D) RT-ddPCR analysis of fibrotic markers in Ctr or DMD iPSC-derived MYOTissues with  
 865 fibroblasts. (E) Expression level of Collagen IV secreted in Ctr and DMD MYOTissues with fibroblasts (f) and

866 *without fibroblasts. (F) Isometric (ISO) contraction analysis: tetanic force developed normalized for CSA in Ctr,*  
867 *DMD and corrDMDdEx8-9 MYOtissues with and without fibroblasts (G) Force drop over 10 repetitions of*  
868 *eccentric (ECC) contractions in Ctr, DMD and corrDMDdEx8-9 MYOtissues including fibroblasts(H) Fatigue*  
869 *index, calculated as % of drop force between two ISO performed before and after 10x repetitions of ECC in Ctr,*  
870 *DMD and corrDMDdEx8-9 MYOtissues +/- respective fibroblasts. Data are presented as mean  $\pm$  SEM (n=3-8).*  
871 *One-way ANOVA with Tukey's correction was performed for statistical purposes (\* $p \leq 0.05$ , \*\* $p \leq 0.01$ , \*\*\* $p \leq$*   
872 *0.001, \*\*\*\* $p \leq 0.000$ , ns= not significant*  
873  
874



875

**Figure 4**

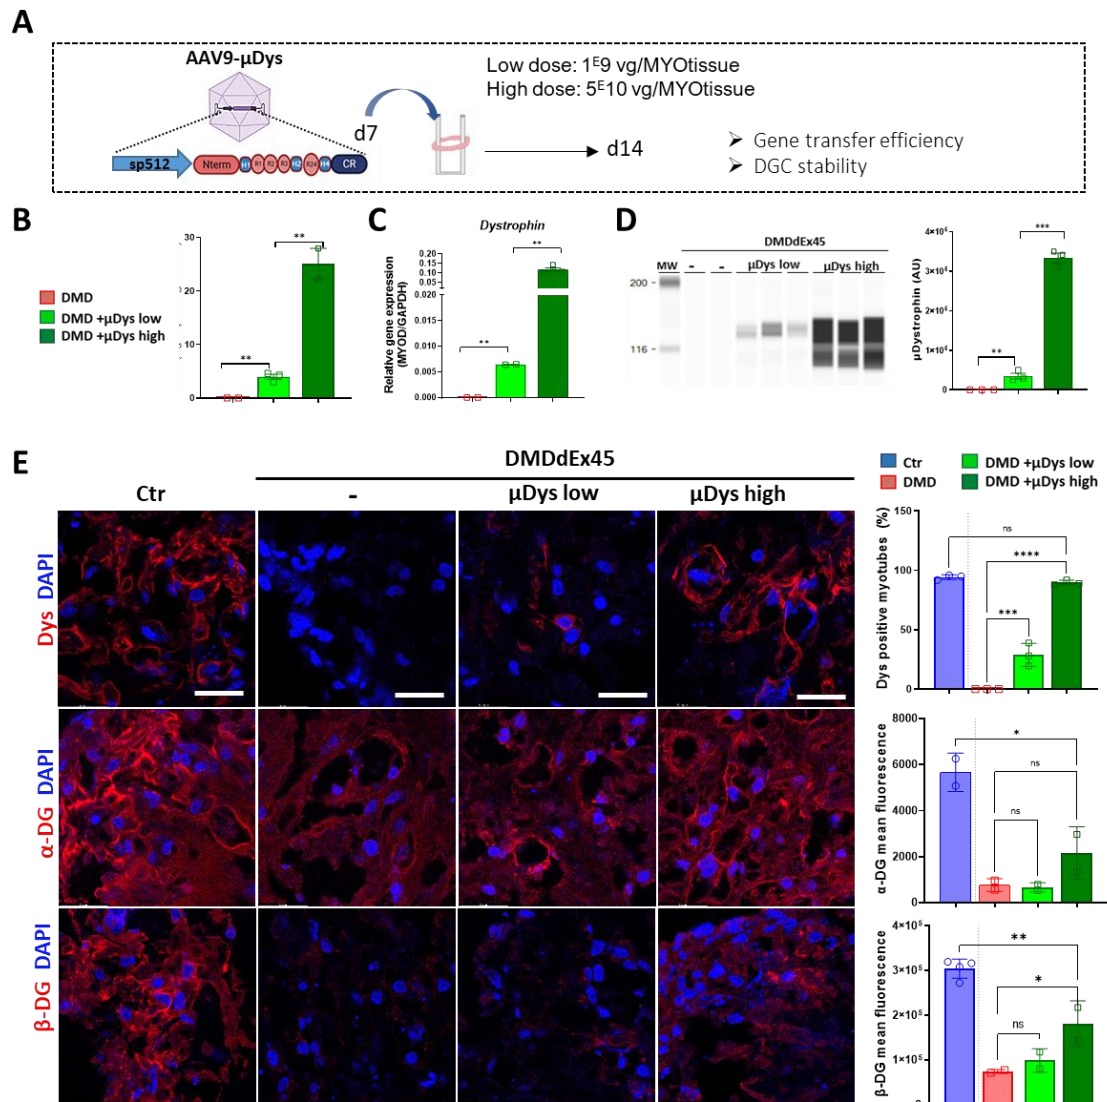

876

877 **Figure 4. AAV-mediated delivery of  $\mu$ Dys in exacerbated DMD MYOTissues ameliorates membrane stability.**  
 878 (A) Scheme of AAV9- $\mu$ Dys infection and doses used in DMD iPSC-derived MYOTissues. (B-C-D) Evaluation of  
 879 gene transfer efficiency by Viral copy number (VCN) analysis (B), mRNA expression levels (C) and protein  
 880 expression analysis by capillary western blot in DMD dEx45-derived MYOTissues infected with low and high  
 881 dose of  $\mu$ Dys versus non infected (-), MW: molecular weight (D). (E) Histological evaluation of Dystrophin  
 882 Glycoprotein Complex (DGC) upon infection, by immunostaining for Dystrophin (Dys),  $\alpha$ -Dystroglycan ( $\alpha$ -DG)  
 883 and  $\beta$ -Dystroglycan ( $\beta$ -DG) of WT and DMD cross sections of MYOTissues. Relative quantifications are shown.  
 884 Data are presented as means +/- SEM. Statistical analysis performed with one-way ANOVA analysis with  
 885 Tukey's correction (\* $p \leq 0.05$ , \*\* $p \leq 0.01$ , \*\*\* $p \leq 0.001$ , \*\*\*\* $p \leq 0.000$ , ns = not significant).

886

887

888

889 **Figure 5**  
890

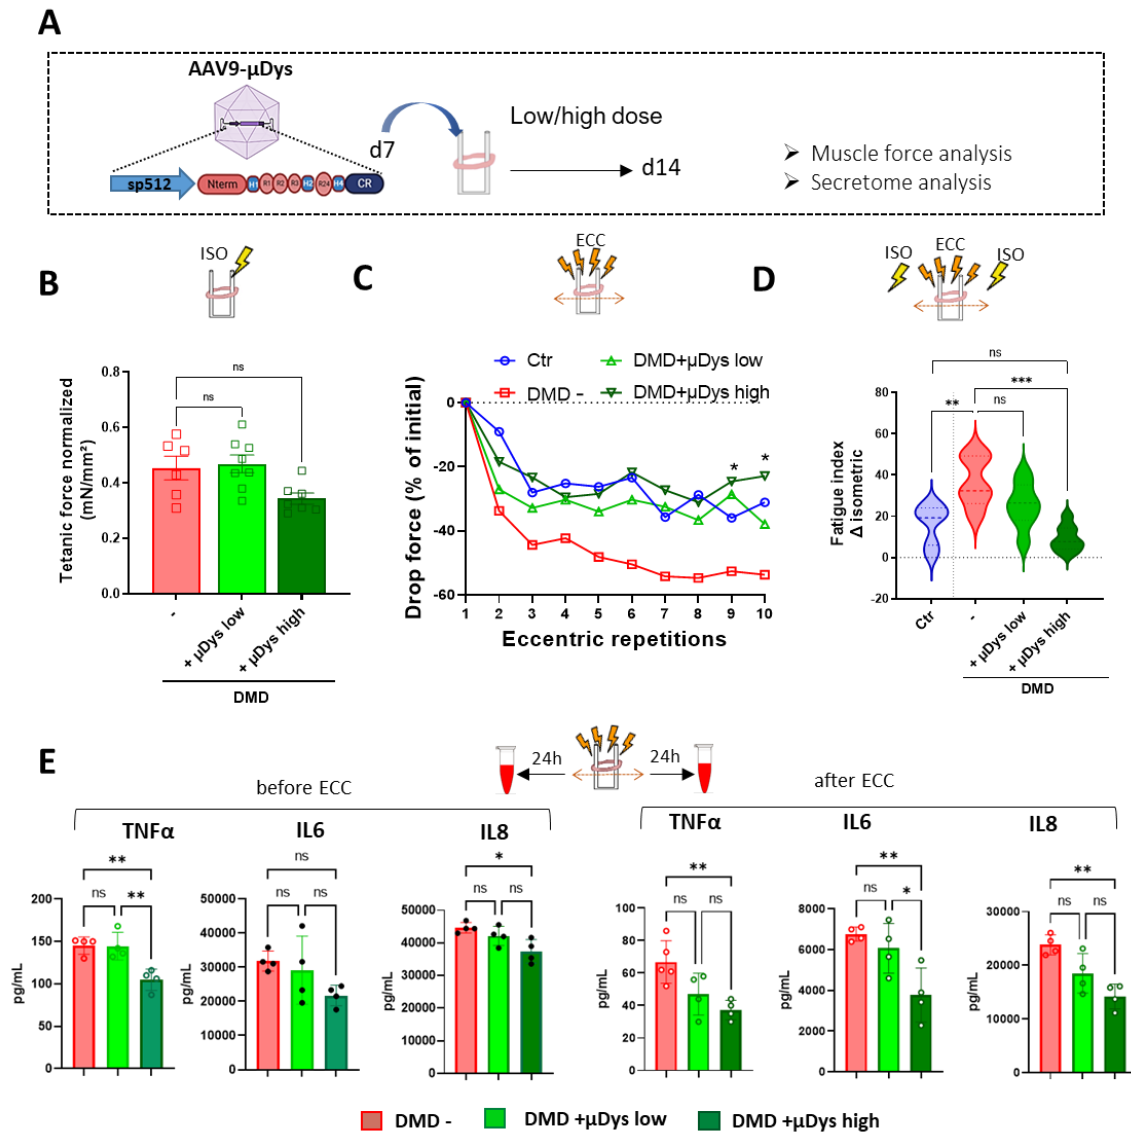

891  
892 **Figure 5. Muscle strength evaluation and secretome analysis following eccentric contractions.** (A) Ctr and  
893 DMDdEx45 MYO tissues subjected to muscle force assessment and to secretome analysis following AAV-μDys  
894 gene transfer. (B) Tetanic force normalized for cross section area (CSA) in untreated (-) and treated with  
895 μDystrophin (μDys) at low and high doses. (C) Drop force over 10 repetitions of eccentric (ECC) contractions  
896 in Ctr and DMDdEx45 MYO tissues including fibroblasts and treated with low and high dose of μDys. (D)  
897 Fatigue index in Ctr and DMDdEx45 MYO tissues treated or not with μDystrophin (E) Quantification of TNF  
898 alpha, IL-6 and IL-8 cytokines released in the media before and after the isometric and eccentric exercises. Data  
899 are presented as mean ± SEM (n=2-8) Statistical analysis performed with one-way ANOVA analysis with Tukey's  
900 correction (\*p ≤ 0.05, \*\*p ≤ 0.01, \*\*\*p ≤ 0.001) ns, not significant.

901

902
